# Supplementary material
Source: MDPI journal article supplement (https://www.mdpi.com/2071-1050/13/22/12685)
Supplement: s1 [file s1]

## Supplementary Information

**Table S1** Correction of equations used in the FW-DW system, compared to the one used in Dijkgraaf et al. (2019)

| Parameter                                 | Equation in Dijkgraaf et al. (2019)                                                                                                                                                                                                                                                                                                                                                                                                                                                              | Correction                                                                                                                                                                         |
|-------------------------------------------|--------------------------------------------------------------------------------------------------------------------------------------------------------------------------------------------------------------------------------------------------------------------------------------------------------------------------------------------------------------------------------------------------------------------------------------------------------------------------------------------------|------------------------------------------------------------------------------------------------------------------------------------------------------------------------------------|
| Energy conversion from MJ to kWh          | Energy in kWh = Energy in MJ * $\frac{10^6}{3600 * 24}$                                                                                                                                                                                                                                                                                                                                                                                                                                          | Energy in kWh = Energy in MJ * $\frac{10^3}{3600}$                                                                                                                                 |
| Methane yield in anaerobic digestion unit | $y_m = m_{COD}^{HPS} * y_{m\ practical}$<br><br>$y_m$ is methane yield (m <sup>3</sup> ), $m_{COD}^{HPS}$ is total COD mass in the HPS(kg), $m_{COD}^{HPS\ to\ AD}$ is total COD mass that goes into ADU (kg), $y_{m\ practical}$ is the practical methane yield per kg COD (m <sup>3</sup> /kg)                                                                                                                                                                                                 | $y_m = m_{COD}^{HPS\ to\ AD} * y_{m\ practical}$                                                                                                                                   |
| Water dilution requirement in HPS         | $V_{dil}^{HPS} = \frac{m_x^{HPS}(t) - V^{HPS} * c_{x\ max}^{HPS}}{c_x^{HPS}}$<br>If $c_x^{HPS}(t) > c_{x\ max}^{HPS}$                                                                                                                                                                                                                                                                                                                                                                            | $V_{dil}^{NS} = \frac{m_x^{HPS}(t) - V^{HPS} * c_{x\ max}^{HPS}}{c_{x\ max}^{HPS} - c_{x\ GW}^x}$<br>If $c_x^{HPS}(t) > c_{x\ max}^{HPS}$ and $c_{x\ max}^{HPS} > c_{x\ GW}^{HPS}$ |
| Mass of N or P in HPS after dilution      | $m_{x\ flushed} = m_{x0} - \max(V_{N\ dil}, V_{P\ dil}) * c_{x0}$<br><br>$m_{x\ flushed}$ is mass of $x$ in the HPS after dilution performed and then flushed (mg),<br>$m_{x0}$ is mass of $x$ before dilution (mg), $V_{N\ dil}$ is Volume of dilution due to N (L), $V_{P\ dil}$ is Volume of dilution due to P (L), $c_{x0}$ is concentration of $x$ before dilution (mg/L), $V_{dil}$ is volme of dilution (L), $V^{HPS}$ is volume of HPS (L), $x$ indicates nitrogen (N) or phosphorus (P) | $m_{x\ flushed} = \frac{m_{x0} + V_{dil} * c_{x\ GW}}{V^{HPS} + V_{dil}} * V^{HPS}$                                                                                                |
